# Supplementary material
Source: publisher site journal article supplement (https://www.dovepress.com/article/505328)
Supplement: Supplementary file 1 [file get_supplementary_file.php]

**Supplemental Method**

***TACE Procedures***

Standard angiographic facilities and protocols were employed for hepatic angiography and catheterization. In all patients, the celia and superior mesenteric arteries were imaged to evaluate the liver vasculature prior to treatment. Super-selective catheterizations by microcatheters were performed in every DEB-TACE or cTACE procedure whenever possible. In patients with bilobar multinodular disease, lobar artery was selective to catheterize at least.

For cTACE, a water-in-oil-type emulsion1 containing 50 mg of doxorubicin (Adriamycin; Pharmacia & Upjohn) with 10-20 mL of lipiodol (Guerbet, Villepinte) was infused, followed by 150-350 µm of gelatin sponge particles (Gelatin Sponge Particle Embolic Agent; Alicon) until stasis was almost attained. For DEB-TACE, DEB was used as recommended2. CalliSpheres microspheres (Jiangsu Hengrui Medical Co., Ltd.) or DC Beads (Biocompatibles UK), measuring 100-300 or 300-500 μm, were employed. Subsequently, 75 mg doxorubicin in sterile water was loaded into each DEB vial (2 mL of beads). The DEB dose was determined by tumor volume (calculation of ellipsoid volume: height × width × length × π/6). To prevent doxorubicin overload in doxorubicin-loaded drug-eluting beads, embolization protocols followed in our research rarely necessitated supplementary embolic materials, and complete devascularization required 300-500 μm Embosphere® microspheres (Merit Medical System Inc, USA).2 The primary chemoembolization endpoint was complete devascularization of the HCC observed on the angiography.3 On-demand TACE procedures were scheduled at an interval of 6-12 weeks upon demonstration of viable tumors or intrahepatic recurrences by CT/MRI in patients with the appropriate clinical and laboratory findings (e.g., performance status, liver function).

**
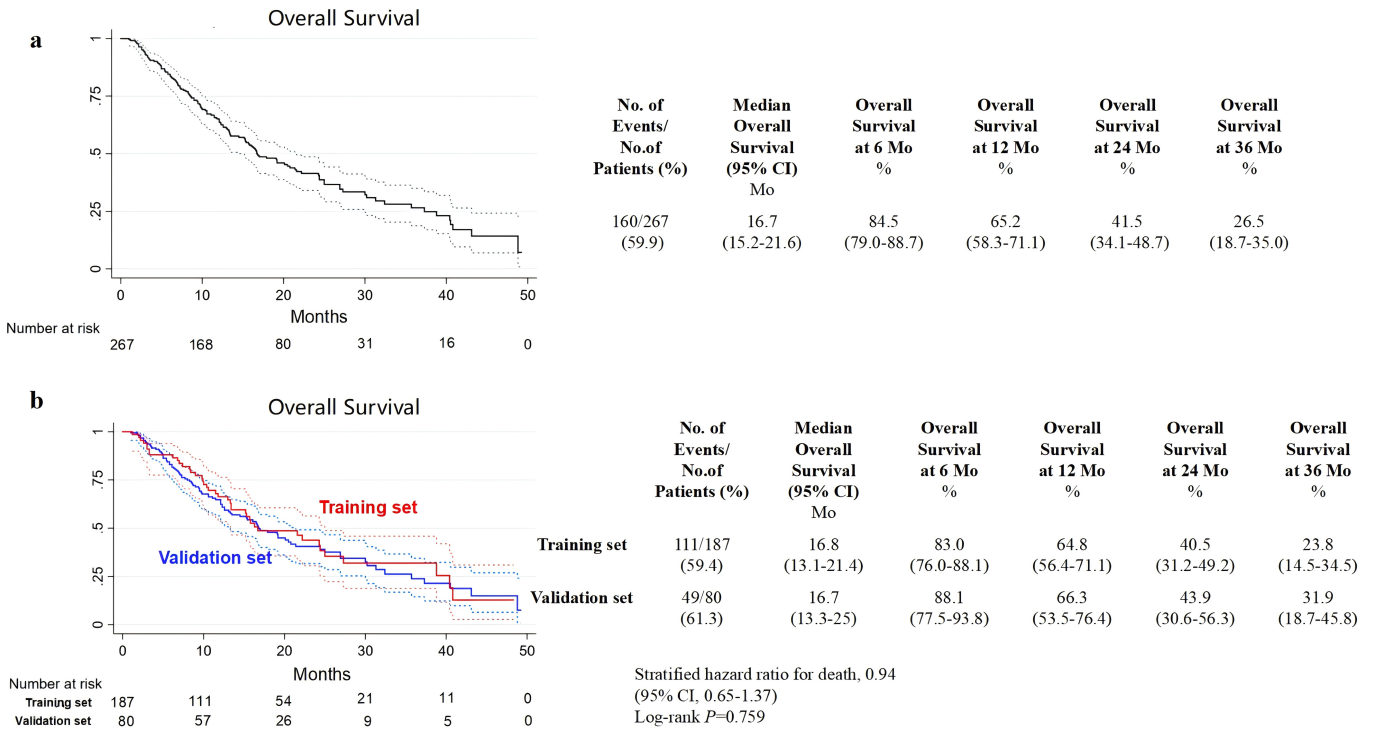
**

**Supplemental Figure 1. Overall survival in the total, training and validation sets. Dotted lines represent the 95% confidence interval.**

Overall survival in the (a) total and (b) training and validation sets.


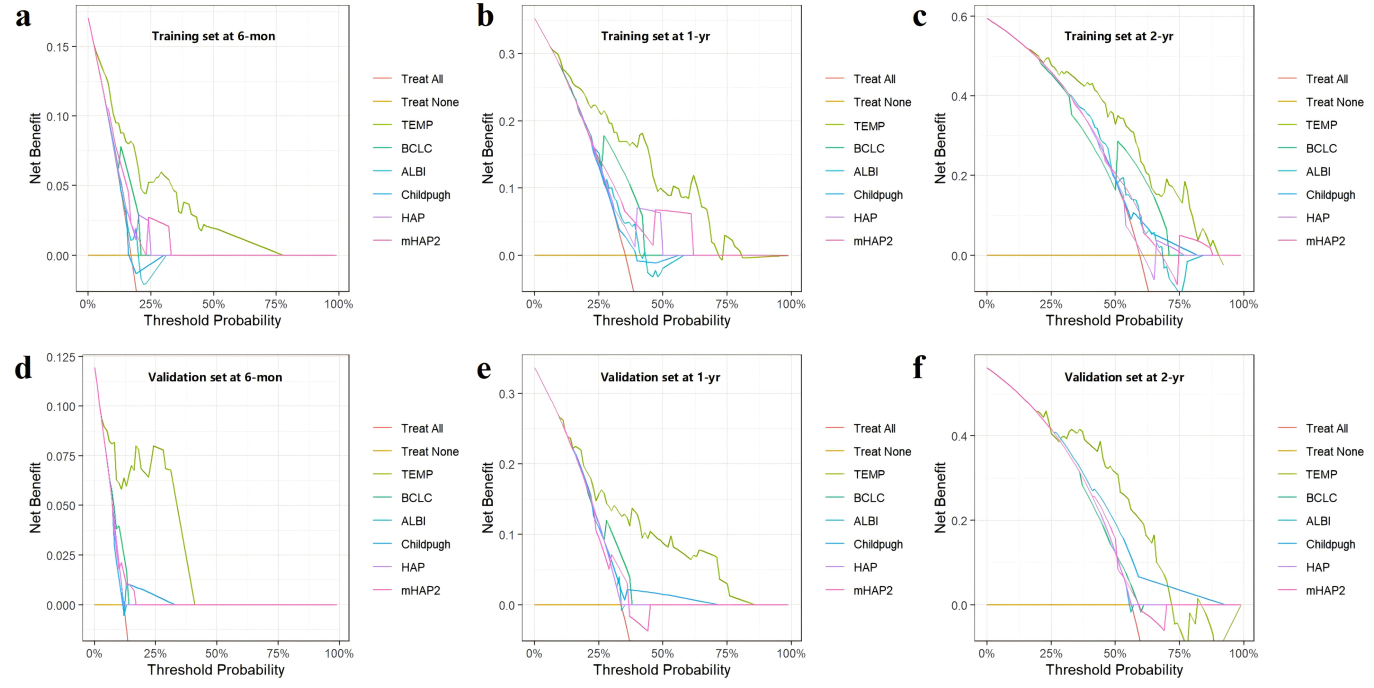


**Supplemental Figure. 2. DCA of benefit rates for TEMP score vs. Currently existing model.**

**The DCA curves of the TEMP score compared with those of other models for 6-month 1-, and 2-year for OS in the training set (a–c) and the validation set (d–f), respectively.**

**Abbreviations:***ALBI* albumin-bilirubin, *BCLC* Barcelona Clinic Liver Cancer, *DCA* decision curve analysis, *HAP* Hepatoma arterial-embolisation prognostic, *mHAP-II* modified HAP-II, *ROC* receiver operating characteristic curve.


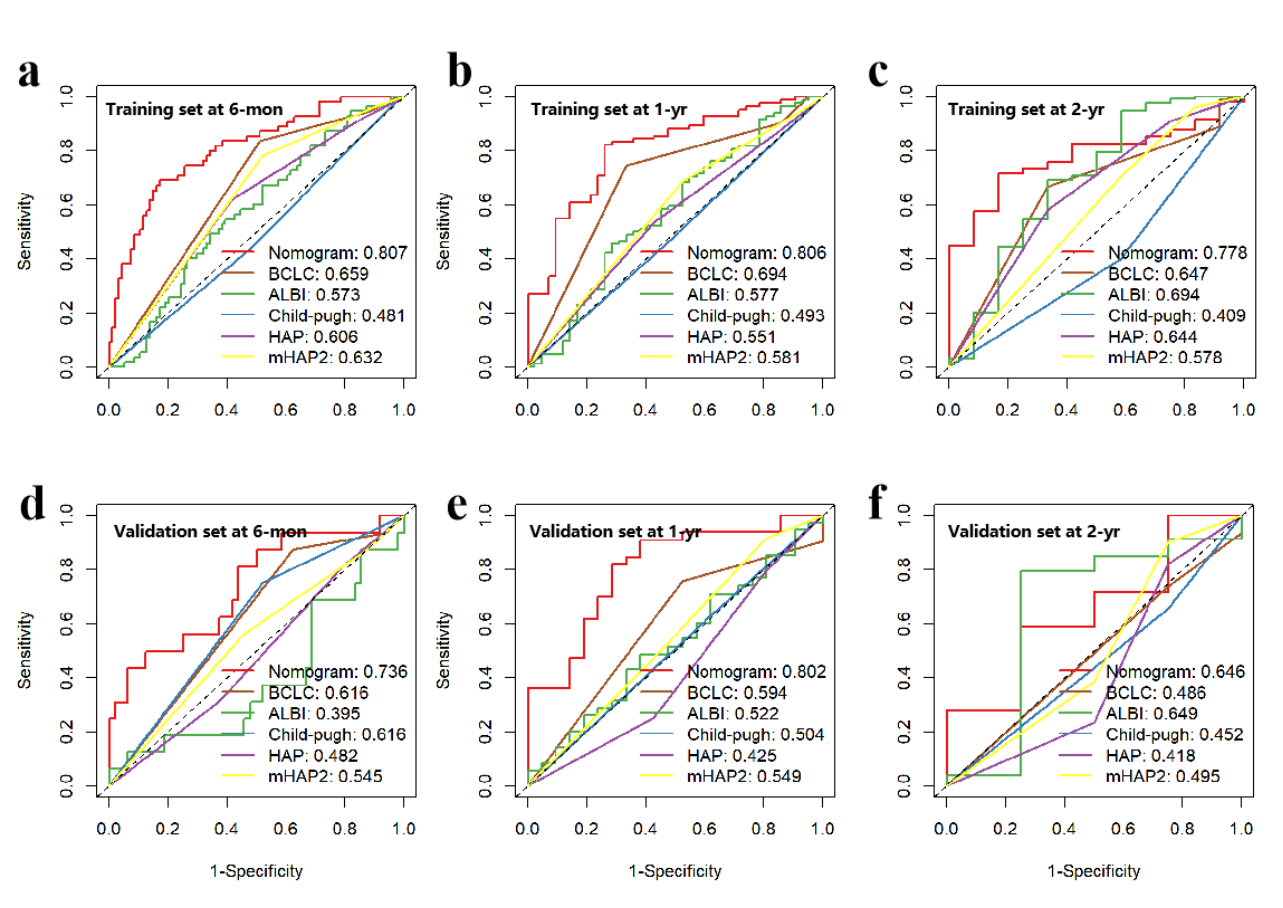


**Supplemental Figure. 3. The time-dependent ROC curves of the nomogram (TEMP score) for time to progression.** **The time-dependent ROC curves of the nomograms compared with those of other models for 6-month 1-, and 2-year time to progression in the training set (a–c) and the validation set (d–f), respectively. The area under the ROC curve for each model is depicted on the graph.**

**Abbreviations:** *ALBI* albumin-bilirubin, *BCLC* Barcelona Clinic Liver Cancer, *HAP* Hepatoma arterial-embolisation prognostic, *mHAP-II* modified HAP-II, *ROC* receiver operating characteristic curve.

**Supplemental Table 1. Previous well recognized prognostic models involving TACE.**

| **Topic** | | **Authors** | **Year** | **Name** | **Candidate** | **Sample size** | **Tumor size (cm)** | **Tumor number 1/>1 (%)** | **CP A/B/C, (%)** | **BCLC stage A/B/C, (%)** | **Prognostic factor** | **Risk grade and OS** |
| --- | --- | --- | --- | --- | --- | --- | --- | --- | --- | --- | --- | --- |
| TACE | Kadalayil L, et at. [4] | 2013 | HAP | - Any BCLC stage - Solitary tumor >3cm or multifocal | 114 (Training) | ≤5: 54%  >5: 46% | 42/56 | 71/26/3 | 35/31/31 | - ALB <36 g/dl: 1 point - AFP >400ng/ml: 1 point - TBil >17 umol/l: 1 point - Tumor size >7cm: 1 point | HAP A: 0 point; 27.6 months  HAP B: 1 point; 18.5 months  HAP C: 2 points; 9.0 months  HAP D: >2 points; 3.6 months |
| 166 (Validation) | ≤5: 49%  >5: 51% | 37/63 | 90/10/0 | NR |
| TACE | Park Y, et al. [5] | 2015 | mHAP-II | - Treatment-naïve - Any BCLC stage   Without EHS | 280 | 3.1 | 50.4/49.6 | 90/10/0 | 55.4/35.0/8.2 | - ALB <36 g/dl: 1 point - AFP >400ng/ml: 1 point - TBil >17 umol/l: 1 point - Tumor size >7cm: 1 point - Tumor number ≥2: 1 point | mHAP-II A: 0 point; 129 months  mHAP-II B: 1 point; 42.7 months  mHAP-II C: 2 points; 33.8 months  mHAP-II D: >2 points; 11.2 months |
| Chironic liver disease | Johnson PJ, et al. [6] | 2015 | ALBI | All disease stages and etiology of chronic liver disease | 1313 (Training) | NR | NR | 65.8/26.6/7.5 | NR | - log10TBil(umol/L): 0.66 - ALB (g/L): -0.085 | Grade 1: ≤-2.60; 85.6 months  Grade 2: >-2.60 to ≤-1.39; 46.5 months  Grade 3: >-1.39; 15.5 months |
| 5097 (Validation) |
| 375 (Validation) | 15.7/66.4/17.9 |

**Abbreviations:***AFP*, alpha fetoprotein; *ALB*, albumin; *BCLC*, Barcelona clinic liver cancer; *CP*, child-pugh; *EHS*, extrahepatic spread; *NA*, not applicable; *NR*, not reported; *TACE*, transarterial chemoembolization; *TBil*, total bilirubin; *VI*, vascular invasion.

**Supplemental Table 2. Characteristics of patients in each institute**

| **Baseline characteristics** | **Number/Median** | | | | | | | | | |
| --- | --- | --- | --- | --- | --- | --- | --- | --- | --- | --- |
| **Institute 1**  **(n=64)** | | **Institute 2**  **(n=59)** | | **Institute 3**  **(n=52)** | | **Institute 4**  **(n=31)** | **Institute 5**  **(n=22)** | **Institute 6**  **(n=27)** | **Institute 7**  **(n=12)** |
| **Training set (n=33)** | **Validation set (n=31)** | **Training set (n=32)** | **Validation set (n=27)** | **Training set (n=30)** | **Validation set (n=22)** | **Training set (n=31)** | **Training set (n=22)** | **Training set (n=27)** | **Training set (n=12)** |
| Age (y) |  |  |  |  |  |  |  |  |  |  |
| < 50 | 10 | 11 | 12 | 10 | 15 | 5 | 10 | 8 | 3 | 8 |
| ≥ 50 | 23 | 20 | 20 | 17 | 15 | 17 | 21 | 14 | 24 | 4 |
| Sex |  |  |  |  |  |  |  |  |  |  |
| Male | 29 | 27 | 28 | 23 | 27 | 19 | 25 | 18 | 20 | 10 |
| Female | 4 | 4 | 4 | 4 | 3 | 3 | 6 | 4 | 7 | 2 |
| Treatment allocation |  |  |  |  |  |  |  |  |  |  |
| DEB-TACE | 17 | 16 | 18 | 13 | 17 | 9 | 18 | 10 | 7 | 5 |
| cTACE | 16 | 15 | 14 | 14 | 13 | 13 | 13 | 12 | 20 | 7 |
| HBV |  |  |  |  |  |  |  |  |  |  |
| No | 8 | 6 | 5 | 3 | 5 | 3 | 5 | 6 | 5 | 2 |
| Yes | 25 | 25 | 27 | 24 | 25 | 19 | 26 | 16 | 22 | 10 |
| AFP (ng/ml) |  |  |  |  |  |  |  |  |  |  |
| < 400 | 13 | 9 | 13 | 11 | 15 | 7 | 14 | 9 | 11 | 5 |
| ≥ 400 | 20 | 22 | 19 | 16 | 15 | 15 | 17 | 13 | 16 | 7 |
| WBC (× 109) | 9.9 | 7.6 | 7.1 | 6.2 | 9.3 | 7.7 | 9.6 | 8.9 | 9.3 | 8.1 |
| RBC (× 1012) | 4.1 | 4.0 | 4.1 | 4.1 | 3.9 | 4.0 | 3.8 | 4.2 | 4.0 | 3.9 |
| Platelet count (× 109) | 178 | 196 | 182 | 201 | 190 | 197 | 183 | 191 | 195 | 181 |
| ALB (g/L) | 34.3 | 34.7 | 35.1 | 34.7 | 34.2 | 34.6 | 34.8 | 34.3 | 34.7 | 34.9 |
| ALT (U/L) | 67.8 | 72.3 | 78.1 | 80.2 | 69.2 | 81.2 | 74.2 | 77.2 | 68.8 | 76.1 |
| PT (s) | 13.2 | 13.5 | 13.1 | 13.3 | 13.2 | 13.6 | 13.6 | 13.3 | 13.1 | 13.7 |
| TBil on admission *a*(umol/L) | 191.2 | 207.4 | 180.1 | 199.5 | 192.9 | 217.4 | 189.4 | 201.4 | 198.7 | 189.3 |
| Pre-TACE TBil *b* (umol/L) | 83.1 | 92.7 | 87.4 | 94.6 | 89.4 | 97.5 | 91.2 | 81.3 | 90.8 | 79.7 |
| Multiple intrahepatic tumors |  |  |  |  |  |  |  |  |  |  |
| No | 18 | 18 | 20 | 19 | 17 | 16 | 16 | 10 | 13 | 6 |
| Yes | 15 | 13 | 12 | 8 | 13 | 6 | 15 | 12 | 14 | 6 |
| Tumor size *c*(cm) |  |  |  |  |  |  |  |  |  |  |
| < 7 cm | 15 | 14 | 16 | 11 | 13 | 12 | 13 | 8 | 12 | 5 |
| ≥ 7 cm | 18 | 17 | 16 | 16 | 17 | 10 | 18 | 14 | 15 | 7 |
| PVTT |  |  |  |  |  |  |  |  |  |  |
| No | 17 | 15 | 12 | 13 | 15 | 9 | 15 | 11 | 9 | 7 |
| Yes | 16 | 16 | 20 | 14 | 15 | 13 | 16 | 11 | 18 | 5 |
| Extrahepatic spread |  |  |  |  |  |  |  |  |  |  |
| No | 25 | 22 | 26 | 20 | 18 | 12 | 23 | 15 | 19 | 10 |
| Yes | 8 | 9 | 6 | 7 | 12 | 10 | 8 | 7 | 8 | 2 |
| BCLC stage |  |  |  |  |  |  |  |  |  |  |
| A | 2 | 2 | 1 | 2 | 3 | 1 | 5 | 3 | 1 | 2 |
| B | 9 | 8 | 8 | 5 | 7 | 7 | 9 | 6 | 8 | 4 |
| C | 22 | 21 | 23 | 20 | 20 | 14 | 17 | 13 | 18 | 6 |
| Child-pugh score | 8 | 7 | 8 | 7 | 8 | 7 | 7 | 8 | 8 | 7 |
| ALBI score | -1.70 | -1.78 | -1.69 | -1.71 | -1.65 | -1.74 | -1.72 | -1.65 | -1.71 | -1.70 |
| HAP score | 2 | 2 | 2 | 2 | 2 | 2 | 2 | 2 | 2 | 2 |
| mHAP-II score | 3 | 3 | 3 | 3 | 3 | 3 | 3 | 3 | 3 | 3 |
| Biliary stent |  |  |  |  |  |  |  |  |  |  |
| No | 30 | 27 | 29 | 22 | 28 | 21 | 26 | 18 | 22 | 11 |
| Yes | 3 | 4 | 3 | 5 | 2 | 1 | 5 | 4 | 5 | 1 |
| Median survival time (months) | 17.8 | 19.4 | 18.6 | 18.1 | 16.9 | 18.2 | 16.1 | 15.4 | 14.9 | 20.2 |
| Post-TACE treatment |  |  |  |  |  |  |  |  |  |  |
| Systemic therapy | 13 | 10 | 11 | 8 | 10 | 8 | 10 | 11 | 10 | 3 |
| Resection/ablation | 5 | 8 | 6 | 2 | 4 | 5 | 4 | 1 | 2 | 2 |
| Liver transplantation | 1 | 2 | 3 | 2 | 0 | 0 | 0 | 0 | 0 | 0 |
| Best supportive care/Unknown | 14 | 11 | 12 | 15 | 16 | 9 | 17 | 10 | 15 | 7 |

**Notes:**Institute 1: The first affiliated hospital of Sun Yat-sen university; Institute 2: The Third Affiliated Hospital of Sun Yat-Sen University; Institute 3: Hainan General Hospital; Institute 4: The First Affiliated Hospital of Guangzhou Pharmaceutical University; Institute 5: Jinshazhou Hospital of Guangzhou University of Chinese Medicine; Institute 6: Affiliated Cancer Hospital & Institute of Guangzhou Medical University; Institute 7: Huizhou First People's Hospital.

*a* TBil on admission, TBil measured at the time of the first diagnosis.

*b* Pre-TACE TBil, TBil measured after successful drainage before performing TACE.

*c* Tumor size, size of the largest tumor.

**Abbreviations:***AFP*, alpha-fetoprotein; *ALB*, albumin; *ALT*, alanine aminotransferase; *ALBI*, albumin-bilirubin; *BCLC*, Barcelona Clinic Liver Cancer; *cTACE*, conventional transarterial chemoembolization; *DEB-TACE*, drug-eluting beads TACE; *HAP*, Hepatoma arterial-embolisation prognostic; *mHAP-II*, modified HAP-II; *PVTT*, portal vein tumor thrombus; *RBC*, red blood cells; *TBil*, total bilirubin; *WBC*, white blood cells.

**Supplemental Table 3. Tumor response in the total, training and validation sets.**

| **Variable** | **Group, No (%)** | | |
| --- | --- | --- | --- |
| **Total (n=267)** | **Training set (n=187)** | **Validation set (n=80)** |
| Complete response | 23 (8.6) | 12 (6.4) | 11 (13.8) |
| Partial response | 151 (56.6) | 103 (55.1) | 48 (60.0) |
| Stable disease | 57 (21.3) | 42 (22.5) | 15 (18.7) |
| Progressive disease | 36 (13.5) | 30 (16.0) | 6 (7.5) |
| Objective response rate | 174 (65.2) | 115 (61.5) | 59 (73.8) |
| Disease control rate | 231 (86.5) | 157 (84.0) | 74 (92.5) |

**Supplemental Table 4. Survival outcomes of different risk grades in the training and validation sets.**

| **Cohort** | **Risk grade** | **Median OS (month) (95% CI)** | **HR (95% CI)** | ***P* value** | **6-month survival rate (95% CI)** | **1-year survival rate (95% CI)** | **2-year survival rate (95% CI)** |
| --- | --- | --- | --- | --- | --- | --- | --- |
| Training set | Low | 26.9 (20.5-35.7) | Ref |  | 93.7 (86.5-97.1) | 83.7 (74.5-89.9) | 57.3 (45.2-67.6) |
|  | Intermediate | 9.4 (7.7-16.7) | 3.61 (2.10-6.22) | <0.001 | 80.9 (62.4-91.0) | 47.4 (28.1-64.4) | 19.7 (6.6-37.9) |
|  | High | 5.8 (3.6-7.0) | 3.49 (2.52-4.84) | <0.001 | 46.6 (27.0-64.0) | 12.1 (2.6-29.6) | NA |
| Validation set | Low | 24.4 (16.3-40.4) | Ref |  | 97.6 (84.3-99.7) | 80.7 (65.1-89.9) | 54.8 (37.3-69.4) |
|  | Intermediate | 13.0 (8.3-18.7) | 2.71 (1.19-6.18) | 0.018 | 93.3 (61.3-99.0) | 54.4 (25.2-76.5) | NA |
|  | High | 3 (1.2-11.8) | 2.25 (1.50-3.38) | <0.001 | 40 (12.3-67.0) | 20 (3.1-47.5) | NA |

**Abbreviations:***CI*, confidence interval; *HR*, hazard ratio; *NA*, not assessable; Ref, referrence.

.

**Supplemental Table 5. Tumor response according to different risk grades in training and validation sets.**

| **Variable** | **Group, No (%)** | | | | | | | |
| --- | --- | --- | --- | --- | --- | --- | --- | --- |
| **Training set** | | | | **Validation set** | | | |
| **Low**  **(n=116)** | **Intermediate (n=39)** | **High (n=32)** | ***P* value** | **Low (n=50)** | **Intermediate (n=18)** | **High (n=12)** | ***P* value** |
| Complete response | 10  (8.6) | 2  (5.1) | 0 | 0.244 | 10  (20.0) | 1  (5.6) | 0 | <0.001 |
| Partial response | 80  (69.0) | 18  (46.2) | 5  (15.6) | <0.001 | 32  (64.0) | 11  (61.1) | 5  (41.7) | 0.391 |
| Stable disease | 19  (16.4) | 12  (30.8) | 11  (34.4) | 0.036 | 7  (14.0) | 6  (33.3) | 2  (16.7) | 0.223 |
| Progressive disease | 7  (6.0) | 7  (17.9) | 16  (50.0) | <0.001 | 1  (2.0) | 0 | 5  (41.7) | <0.001 |
| Objective response rate | 90  (77.6) | 20  (51.3) | 5  (15.6) | <0.001 | 42  (84.0) | 12  (66.7) | 5  (41.7) | 0.008 |
| Disease control rate | 109  (94.0) | 32  (82.1) | 16  (50.0) | <0.001 | 49  (98.0) | 18  (100) | 7  (58.3) | <0.001 |

**Referrence for Supplemental Material**

1. de Baere T, Arai Y, Lencioni R, Geschwind J-F, Rilling W, Salem R, Matsui O, Soulen MC. Treatment of Liver Tumors with Lipiodol TACE: Technical Recommendations from Experts Opinion. CardioVascular and Interventional Radiology 2015;39(3):334-343. doi: 10.1007/s00270-015-1208-y
2. Lencioni R, de Baere T, Burrel M, Caridi JG, Lammer J, Malagari K, Martin RC, O'Grady E, Real MI, Vogl TJ, Watkinson A, Geschwind JF. Transcatheter treatment of hepatocellular carcinoma with Doxorubicin-loaded DC Bead (DEBDOX): technical recommendations. Cardiovasc Intervent Radiol 2012;35(5):980-985. doi: 10.1007/s00270-011-0287-7
3. Grosso M, Vignali C, Quaretti P, Nicolini A, Melchiorre F, Gallarato G, Bargellini I, Petruzzi P, Massa Saluzzo C, Crespi S, Sarti I. Transarterial chemoembolization for hepatocellular carcinoma with drug-eluting microspheres: preliminary results from an Italian multicentre study. Cardiovasc Intervent Radiol 2008;31(6):1141-1149. doi: 10.1007/s00270-008-9409-2
4. Park Y, Kim SU, Kim BK, et al. Addition of tumor multiplicity improves the prognostic performance of the hepatoma arterial-embolization prognostic score. Liver Int. 2016;36(1):100-7.
5. Johnson PJ, Berhane S, Kagebayashi C, et al. Assessment of liver function in patients with hepatocellular carcinoma: a new evidence-based approach-the ALBI grade. J Clin Oncol. 2015;33(6):550-8.
6. Xu L, Peng ZW, Chen MS, et al. Prognostic nomogram for patients with unresectable hepatocellular carcinoma after transcatheter arterial chemoembolization. J Hepatol. 2015;63(1):122-30.
